# Supplementary material
Source: publisher figshare collection journal article supplement (https://gsajournals.figshare.com/articles/dataset/_/6429494)
Supplement: Supplementary file 1 [file 1]

## SUPPLEMENTARY MATERIAL FOR:

**The genomic architecture of a rapid island radiation: recombination rate variation, chromosome structure, and genome assembly of the Hawaiian cricket *Laupala*.**

**GENETICS/2018/300894**

Table S1. Geographic locations of sampled populations

Table S2. Segregation distortion (count of heterozygotes per genotype) statistics.

Table S3. Summary statistics for anchored assembly

Table S4. Integrated AFLP and SNP map for the *L. kohalensis* x *L. paranigra* cross

Figure S1. Comprehensive linkage maps.

Figure S2. ALLMAPS output

Figure S3. Coverage per cross per linkage group

## TABLES

Table S1. Geographic locations of sampled populations

| Species              | Locality Name | Latitude (N) | Longitude (W) |
|----------------------|---------------|--------------|---------------|
| <i>L. kona</i>       | Manuka        | 19 deg 12'   | 155 deg 81'   |
| <i>L. paranigra</i>  | Kaiwika       | 19 deg 46'   | 155 deg 10'   |
| <i>L. kohalensis</i> | Pololu Valley | 20 deg 10'   | 155 deg 46'   |
| <i>L. pruna</i>      | Kaiholena     | 19 deg 10'   | 155 deg 35'   |

Table S2. Segregation distortion statistics. Tukey Honest Significant Differences between expected and observed frequencies of heterozygotes (a) across linkage groups (b) across species, (c) and across species nested in linkage groups

| contrast | difference | lower bound | upper bound | P-adjusted |
|----------|------------|-------------|-------------|------------|
| (a)      |            |             |             |            |

|                   |          |          |           |               |
|-------------------|----------|----------|-----------|---------------|
| 1--3              | 0.017921 | 0.009122 | 0.026719  | <b>0.0000</b> |
| 2--3              | 0.008175 | -0.00072 | 0.017069  | 0.0954        |
| 4--3              | -0.00601 | -0.01562 | 0.003601  | 0.5168        |
| 5--3              | 0.008896 | -0.00102 | 0.018812  | 0.1125        |
| 7--3              | -0.02664 | -0.03742 | -0.01586  | <b>0.0000</b> |
| 6--3              | -0.01786 | -0.02932 | -0.0064   | <b>0.0001</b> |
| 2--1              | -0.00975 | -0.01874 | -0.00075  | <b>0.0237</b> |
| 4--1              | -0.02393 | -0.03364 | -0.01423  | <b>0.0000</b> |
| 5--1              | -0.00902 | -0.01903 | 0.000982  | 0.1086        |
| 7--1              | -0.04456 | -0.05543 | -0.0337   | <b>0.0000</b> |
| 6--1              | -0.03578 | -0.04732 | -0.02425  | <b>0.0000</b> |
| 4--2              | -0.01419 | -0.02398 | -0.0044   | <b>0.0004</b> |
| 5--2              | 0.00072  | -0.00937 | 0.01081   | 1.0000        |
| 7--2              | -0.03482 | -0.04576 | -0.02388  | <b>0.0000</b> |
| 6--2              | -0.02604 | -0.03764 | -0.01443  | <b>0.0000</b> |
| 5--4              | 0.014907 | 0.004178 | 0.025637  | <b>0.0009</b> |
| 7--4              | -0.02063 | -0.03216 | -0.0091   | <b>0.0000</b> |
| 6--4              | -0.01185 | -0.02402 | 0.000318  | 0.0622        |
| 7--5              | -0.03554 | -0.04732 | -0.02375  | <b>0.0000</b> |
| 6--5              | -0.02676 | -0.03917 | -0.01435  | <b>0.0000</b> |
| 6--7              | 0.008781 | -0.00433 | 0.021891  | <b>0.4295</b> |
| <b>(b)</b>        |          |          |           |               |
| konpar-parkoh     | -0.0155  | -0.02039 | -0.01062  | <b>0.0000</b> |
| prukoh-parkoh     | -0.02437 | -0.03058 | -0.01816  | <b>0.0000</b> |
| prukoh-konpar     | -0.00886 | -0.01475 | -0.00297  | <b>0.0012</b> |
| <b>(c)</b>        |          |          |           |               |
| 1:parkoh-3:parkoh | -0.00225 | -0.01967 | 1.52E-02  | 1.0000        |
| 2:parkoh-3:parkoh | 0.008894 | -0.00981 | 2.76E-02  | 0.9835        |
| 4:parkoh-3:parkoh | -0.02438 | -0.0469  | -1.87E-03 | <b>0.0178</b> |
| 5:parkoh-3:parkoh | 0.003542 | -0.01602 | 2.31E-02  | 1.0000        |
| 7:parkoh-3:parkoh | -0.05123 | -0.07443 | -2.80E-02 | <b>0.0000</b> |
| 6:parkoh-3:parkoh | -0.03392 | -0.05676 | -1.11E-02 | <b>0.0000</b> |
| 3:konpar-3:parkoh | -0.03299 | -0.04963 | -1.63E-02 | <b>0.0000</b> |
| 1:konpar-3:parkoh | -0.0081  | -0.02516 | 8.96E-03  | 0.9839        |
| 2:konpar-3:parkoh | -0.01921 | -0.03615 | -2.27E-03 | <b>0.0089</b> |
| 4:konpar-3:parkoh | -0.01981 | -0.03754 | -2.07E-03 | <b>0.0113</b> |
| 5:konpar-3:parkoh | -0.0266  | -0.04561 | -7.60E-03 | <b>0.0001</b> |
| 7:konpar-3:parkoh | -0.05016 | -0.06964 | -3.07E-02 | <b>0.0000</b> |
| 6:konpar-3:parkoh | -0.03407 | -0.05469 | -1.35E-02 | <b>0.0000</b> |
| 3:prukoh-3:parkoh | -0.03762 | -0.05901 | -1.62E-02 | <b>0.0000</b> |
| 1:prukoh-3:parkoh | 0.000708 | -0.02165 | 2.31E-02  | 1.0000        |

|                   |          |          |           |               |
|-------------------|----------|----------|-----------|---------------|
| 2:prukoh-3:parkoh | -0.0359  | -0.05673 | -1.51E-02 | <b>0.0000</b> |
| 4:prukoh-3:parkoh | -0.04794 | -0.06946 | -2.64E-02 | <b>0.0000</b> |
| 5:prukoh-3:parkoh | -0.01828 | -0.04429 | 7.73E-03  | 0.5987        |
| 7:prukoh-3:parkoh | -0.04113 | -0.06927 | -1.30E-02 | <b>0.0000</b> |
| 6:prukoh-3:parkoh | -0.0881  | -0.12526 | -5.09E-02 | <b>0.0000</b> |
| 2:parkoh-1:parkoh | 0.011142 | -0.00727 | 2.96E-02  | 0.8411        |
| 4:parkoh-1:parkoh | -0.02214 | -0.04441 | 1.39E-04  | <b>0.0537</b> |
| 5:parkoh-1:parkoh | 0.00579  | -0.0135  | 2.51E-02  | 1.0000        |
| 7:parkoh-1:parkoh | -0.04899 | -0.07195 | -2.60E-02 | <b>0.0000</b> |
| 6:parkoh-1:parkoh | -0.03167 | -0.05428 | -9.06E-03 | <b>0.0001</b> |
| 3:konpar-1:parkoh | -0.03074 | -0.04706 | -1.44E-02 | <b>0.0000</b> |
| 1:konpar-1:parkoh | -0.00585 | -0.02259 | 1.09E-02  | 0.9997        |
| 2:konpar-1:parkoh | -0.01696 | -0.03359 | -3.44E-04 | <b>0.0391</b> |
| 4:konpar-1:parkoh | -0.01756 | -0.03498 | -1.32E-04 | <b>0.0457</b> |
| 5:konpar-1:parkoh | -0.02436 | -0.04308 | -5.64E-03 | <b>0.0007</b> |
| 7:konpar-1:parkoh | -0.04791 | -0.06712 | -2.87E-02 | <b>0.0000</b> |
| 6:konpar-1:parkoh | -0.03183 | -0.05218 | -1.15E-02 | <b>0.0000</b> |
| 3:prukoh-1:parkoh | -0.03537 | -0.05651 | -1.42E-02 | <b>0.0000</b> |
| 1:prukoh-1:parkoh | 0.002956 | -0.01916 | 2.51E-02  | 1.0000        |
| 2:prukoh-1:parkoh | -0.03366 | -0.05422 | -1.31E-02 | <b>0.0000</b> |
| 4:prukoh-1:parkoh | -0.04569 | -0.06696 | -2.44E-02 | <b>0.0000</b> |
| 5:prukoh-1:parkoh | -0.01603 | -0.04183 | 9.77E-03  | 0.8077        |
| 7:prukoh-1:parkoh | -0.03888 | -0.06683 | -1.09E-02 | <b>0.0001</b> |
| 6:prukoh-1:parkoh | -0.08585 | -0.12287 | -4.88E-02 | <b>0.0000</b> |
| 4:parkoh-2:parkoh | -0.03328 | -0.05656 | -9.99E-03 | <b>0.0001</b> |
| 5:parkoh-2:parkoh | -0.00535 | -0.0258  | 1.51E-02  | 1.0000        |
| 7:parkoh-2:parkoh | -0.06013 | -0.08407 | -3.62E-02 | <b>0.0000</b> |
| 6:parkoh-2:parkoh | -0.04281 | -0.06642 | -1.92E-02 | <b>0.0000</b> |
| 3:konpar-2:parkoh | -0.04188 | -0.05956 | -2.42E-02 | <b>0.0000</b> |
| 1:konpar-2:parkoh | -0.01699 | -0.03506 | 1.08E-03  | <b>0.0965</b> |
| 2:konpar-2:parkoh | -0.02811 | -0.04606 | -1.02E-02 | <b>0.0000</b> |
| 4:konpar-2:parkoh | -0.0287  | -0.0474  | -1.00E-02 | <b>0.0000</b> |
| 5:konpar-2:parkoh | -0.0355  | -0.05541 | -1.56E-02 | <b>0.0000</b> |
| 7:konpar-2:parkoh | -0.05905 | -0.07942 | -3.87E-02 | <b>0.0000</b> |
| 6:konpar-2:parkoh | -0.04297 | -0.06442 | -2.15E-02 | <b>0.0000</b> |
| 3:prukoh-2:parkoh | -0.04651 | -0.06872 | -2.43E-02 | <b>0.0000</b> |
| 1:prukoh-2:parkoh | -0.00819 | -0.03132 | 1.49E-02  | 0.9997        |
| 2:prukoh-2:parkoh | -0.0448  | -0.06645 | -2.31E-02 | <b>0.0000</b> |
| 4:prukoh-2:parkoh | -0.05684 | -0.07916 | -3.45E-02 | <b>0.0000</b> |
| 5:prukoh-2:parkoh | -0.02717 | -0.05385 | -4.95E-04 | <b>0.0402</b> |
| 7:prukoh-2:parkoh | -0.05003 | -0.07879 | -2.13E-02 | <b>0.0000</b> |

|                   |          |          |           |               |
|-------------------|----------|----------|-----------|---------------|
| 6:prukoh-2:parkoh | -0.09699 | -0.13463 | -5.94E-02 | <b>0.0000</b> |
| 5:parkoh-4:parkoh | 0.027926 | 0.003943 | 5.19E-02  | <b>0.0058</b> |
| 7:parkoh-4:parkoh | -0.02685 | -0.05388 | 1.77E-04  | <b>0.0539</b> |
| 6:parkoh-4:parkoh | -0.00953 | -0.03626 | 1.72E-02  | 0.9996        |
| 3:konpar-4:parkoh | -0.0086  | -0.03027 | 1.31E-02  | 0.9982        |
| 1:konpar-4:parkoh | 0.016287 | -0.0057  | 3.83E-02  | 0.4920        |
| 2:konpar-4:parkoh | 0.005171 | -0.01673 | 2.71E-02  | 1.0000        |
| 4:konpar-4:parkoh | 0.004578 | -0.01794 | 2.71E-02  | 1.0000        |
| 5:konpar-4:parkoh | -0.00222 | -0.02575 | 2.13E-02  | 1.0000        |
| 7:konpar-4:parkoh | -0.02577 | -0.04969 | -1.85E-03 | <b>0.0192</b> |
| 6:konpar-4:parkoh | -0.00969 | -0.03454 | 1.52E-02  | 0.9986        |
| 3:prukoh-4:parkoh | -0.01323 | -0.03873 | 1.23E-02  | 0.9584        |
| 1:prukoh-4:parkoh | 0.025092 | -0.00122 | 5.14E-02  | <b>0.0841</b> |
| 2:prukoh-4:parkoh | -0.01152 | -0.03654 | 1.35E-02  | 0.9886        |
| 4:prukoh-4:parkoh | -0.02356 | -0.04916 | 2.05E-03  | <b>0.1190</b> |
| 5:prukoh-4:parkoh | 0.006104 | -0.02337 | 3.56E-02  | 1.0000        |
| 7:prukoh-4:parkoh | -0.01675 | -0.04812 | 1.46E-02  | 0.9452        |
| 6:prukoh-4:parkoh | -0.06372 | -0.10339 | -2.40E-02 | <b>0.0000</b> |
| 7:parkoh-5:parkoh | -0.05478 | -0.0794  | -3.02E-02 | <b>0.0000</b> |
| 6:parkoh-5:parkoh | -0.03746 | -0.06175 | -1.32E-02 | <b>0.0000</b> |
| 3:konpar-5:parkoh | -0.03653 | -0.05511 | -1.79E-02 | <b>0.0000</b> |
| 1:konpar-5:parkoh | -0.01164 | -0.03059 | 7.32E-03  | 0.8233        |
| 2:konpar-5:parkoh | -0.02275 | -0.0416  | -3.91E-03 | <b>0.0031</b> |
| 4:konpar-5:parkoh | -0.02335 | -0.04291 | -3.79E-03 | <b>0.0038</b> |
| 5:konpar-5:parkoh | -0.03015 | -0.05087 | -9.42E-03 | <b>0.0000</b> |
| 7:konpar-5:parkoh | -0.0537  | -0.07486 | -3.25E-02 | <b>0.0000</b> |
| 6:konpar-5:parkoh | -0.03761 | -0.05982 | -1.54E-02 | <b>0.0000</b> |
| 3:prukoh-5:parkoh | -0.04116 | -0.0641  | -1.82E-02 | <b>0.0000</b> |
| 1:prukoh-5:parkoh | -0.00283 | -0.02667 | 2.10E-02  | 1.0000        |
| 2:prukoh-5:parkoh | -0.03944 | -0.06185 | -1.70E-02 | <b>0.0000</b> |
| 4:prukoh-5:parkoh | -0.05148 | -0.07454 | -2.84E-02 | <b>0.0000</b> |
| 5:prukoh-5:parkoh | -0.02182 | -0.04911 | 5.47E-03  | 0.3364        |
| 7:prukoh-5:parkoh | -0.04467 | -0.074   | -1.53E-02 | <b>0.0000</b> |
| 6:prukoh-5:parkoh | -0.09164 | -0.12971 | -5.36E-02 | <b>0.0000</b> |
| 6:parkoh-7:parkoh | 0.017315 | -0.00999 | 4.46E-02  | 0.7787        |
| 3:konpar-7:parkoh | 0.018246 | -0.00413 | 4.06E-02  | 0.2992        |
| 1:konpar-7:parkoh | 0.043137 | 0.020451 | 6.58E-02  | <b>0.0000</b> |
| 2:konpar-7:parkoh | 0.032021 | 0.009425 | 5.46E-02  | <b>0.0001</b> |
| 4:konpar-7:parkoh | 0.031428 | 0.008233 | 5.46E-02  | <b>0.0003</b> |
| 5:konpar-7:parkoh | 0.02463  | 0.000448 | 4.88E-02  | <b>0.0402</b> |
| 7:konpar-7:parkoh | 0.001077 | -0.02349 | 2.56E-02  | 1.0000        |

|                   |          |          |           |               |
|-------------------|----------|----------|-----------|---------------|
| 6:konpar-7:parkoh | 0.017161 | -0.00831 | 4.26E-02  | 0.6787        |
| 3:prukoh-7:parkoh | 0.013617 | -0.01249 | 3.97E-02  | 0.9562        |
| 1:prukoh-7:parkoh | 0.051942 | 0.025044 | 7.88E-02  | <b>0.0000</b> |
| 2:prukoh-7:parkoh | 0.015331 | -0.0103  | 4.10E-02  | 0.8547        |
| 4:prukoh-7:parkoh | 0.003292 | -0.02291 | 2.95E-02  | 1.0000        |
| 5:prukoh-7:parkoh | 0.032954 | 0.002954 | 6.30E-02  | <b>0.0145</b> |
| 7:prukoh-7:parkoh | 0.010102 | -0.02176 | 4.20E-02  | 0.9999        |
| 6:prukoh-7:parkoh | -0.03687 | -0.07693 | 3.19E-03  | 0.1187        |
| 3:konpar-6:parkoh | 0.000931 | -0.02108 | 2.29E-02  | 1.0000        |
| 1:konpar-6:parkoh | 0.025822 | 0.003496 | 4.81E-02  | <b>0.0065</b> |
| 2:konpar-6:parkoh | 0.014706 | -0.00753 | 3.69E-02  | 0.7117        |
| 4:konpar-6:parkoh | 0.014113 | -0.00873 | 3.70E-02  | 0.8152        |
| 5:konpar-6:parkoh | 0.007315 | -0.01653 | 3.12E-02  | 1.0000        |
| 7:konpar-6:parkoh | -0.01624 | -0.04047 | 7.99E-03  | 0.6886        |
| 6:konpar-6:parkoh | -0.00015 | -0.0253  | 2.50E-02  | 1.0000        |
| 3:prukoh-6:parkoh | -0.0037  | -0.02949 | 2.21E-02  | 1.0000        |
| 1:prukoh-6:parkoh | 0.034627 | 0.008032 | 6.12E-02  | <b>0.0007</b> |
| 2:prukoh-6:parkoh | -0.00198 | -0.0273  | 2.33E-02  | 1.0000        |
| 4:prukoh-6:parkoh | -0.01402 | -0.03992 | 1.19E-02  | 0.9374        |
| 5:prukoh-6:parkoh | 0.015639 | -0.01409 | 4.54E-02  | 0.9525        |
| 7:prukoh-6:parkoh | -0.00721 | -0.03882 | 2.44E-02  | 1.0000        |
| 6:prukoh-6:parkoh | -0.05418 | -0.09404 | -1.43E-02 | <b>0.0003</b> |
| 1:konpar-3:konpar | 0.024891 | 0.008963 | 4.08E-02  | <b>0.0000</b> |
| 2:konpar-3:konpar | 0.013775 | -0.00202 | 2.96E-02  | 0.1878        |
| 4:konpar-3:konpar | 0.013182 | -0.00346 | 2.98E-02  | 0.3552        |
| 5:konpar-3:konpar | 0.006384 | -0.01161 | 2.44E-02  | 0.9996        |
| 7:konpar-3:konpar | -0.01717 | -0.03567 | 1.33E-03  | <b>0.1099</b> |
| 6:konpar-3:konpar | -0.00109 | -0.02077 | 1.86E-02  | 1.0000        |
| 3:prukoh-3:konpar | -0.00463 | -0.02513 | 1.59E-02  | 1.0000        |
| 1:prukoh-3:konpar | 0.033696 | 0.012189 | 5.52E-02  | <b>0.0000</b> |
| 2:prukoh-3:konpar | -0.00291 | -0.02282 | 1.70E-02  | 1.0000        |
| 4:prukoh-3:konpar | -0.01495 | -0.03559 | 5.68E-03  | 0.5369        |
| 5:prukoh-3:konpar | 0.014708 | -0.01057 | 4.00E-02  | 0.8830        |
| 7:prukoh-3:konpar | -0.00814 | -0.03561 | 1.93E-02  | 1.0000        |
| 6:prukoh-3:konpar | -0.05511 | -0.09177 | -1.85E-02 | <b>0.0000</b> |
| 2:konpar-1:konpar | -0.01112 | -0.02735 | 5.12E-03  | 0.6496        |
| 4:konpar-1:konpar | -0.01171 | -0.02877 | 5.35E-03  | 0.6448        |
| 5:konpar-1:konpar | -0.01851 | -0.03689 | -1.26E-04 | <b>0.0461</b> |
| 7:konpar-1:konpar | -0.04206 | -0.06094 | -2.32E-02 | <b>0.0000</b> |
| 6:konpar-1:konpar | -0.02598 | -0.04602 | -5.94E-03 | <b>0.0007</b> |
| 3:prukoh-1:konpar | -0.02952 | -0.05036 | -8.68E-03 | <b>0.0001</b> |

|                   |          |          |           |               |
|-------------------|----------|----------|-----------|---------------|
| 1:prukoh-1:konpar | 0.008805 | -0.01303 | 3.06E-02  | 0.9978        |
| 2:prukoh-1:konpar | -0.02781 | -0.04806 | -7.55E-03 | <b>0.0002</b> |
| 4:prukoh-1:konpar | -0.03984 | -0.06082 | -1.89E-02 | <b>0.0000</b> |
| 5:prukoh-1:konpar | -0.01018 | -0.03574 | 1.54E-02  | 0.9982        |
| 7:prukoh-1:konpar | -0.03304 | -0.06076 | -5.31E-03 | <b>0.0039</b> |
| 6:prukoh-1:konpar | -0.08    | -0.11685 | -4.32E-02 | <b>0.0000</b> |
| 4:konpar-2:konpar | -0.00059 | -0.01753 | 1.63E-02  | 1.0000        |
| 5:konpar-2:konpar | -0.00739 | -0.02566 | 1.09E-02  | 0.9977        |
| 7:konpar-2:konpar | -0.03094 | -0.04972 | -1.22E-02 | <b>0.0000</b> |
| 6:konpar-2:konpar | -0.01486 | -0.0348  | 5.08E-03  | 0.4790        |
| 3:prukoh-2:konpar | -0.0184  | -0.03915 | 2.34E-03  | 0.1635        |
| 1:prukoh-2:konpar | 0.019921 | -0.00182 | 4.17E-02  | 0.1233        |
| 2:prukoh-2:konpar | -0.01669 | -0.03684 | 3.46E-03  | 0.2713        |
| 4:prukoh-2:konpar | -0.02873 | -0.0496  | -7.85E-03 | <b>0.0002</b> |
| 5:prukoh-2:konpar | 0.000933 | -0.02454 | 2.64E-02  | 1.0000        |
| 7:prukoh-2:konpar | -0.02192 | -0.04957 | 5.73E-03  | 0.3532        |
| 6:prukoh-2:konpar | -0.06889 | -0.10568 | -3.21E-02 | <b>0.0000</b> |
| 5:konpar-4:konpar | -0.0068  | -0.0258  | 1.22E-02  | 0.9996        |
| 7:konpar-4:konpar | -0.03035 | -0.04984 | -1.09E-02 | <b>0.0000</b> |
| 6:konpar-4:konpar | -0.01427 | -0.03488 | 6.35E-03  | 0.6288        |
| 3:prukoh-4:konpar | -0.01781 | -0.03921 | 3.59E-03  | 0.2622        |
| 1:prukoh-4:konpar | 0.020514 | -0.00184 | 4.29E-02  | 0.1220        |
| 2:prukoh-4:konpar | -0.0161  | -0.03692 | 4.73E-03  | 0.4037        |
| 4:prukoh-4:konpar | -0.02814 | -0.04966 | -6.61E-03 | <b>0.0006</b> |
| 5:prukoh-4:konpar | 0.001526 | -0.02448 | 2.75E-02  | 1.0000        |
| 7:prukoh-4:konpar | -0.02133 | -0.04947 | 6.81E-03  | 0.4444        |
| 6:prukoh-4:konpar | -0.06829 | -0.10546 | -3.11E-02 | <b>0.0000</b> |
| 7:konpar-5:konpar | -0.02355 | -0.04421 | -2.90E-03 | <b>0.0081</b> |
| 6:konpar-5:konpar | -0.00747 | -0.02919 | 1.43E-02  | 0.9998        |
| 3:prukoh-5:konpar | -0.01101 | -0.03348 | 1.15E-02  | 0.9769        |
| 1:prukoh-5:konpar | 0.027312 | 0.00393  | 5.07E-02  | <b>0.0055</b> |
| 2:prukoh-5:konpar | -0.0093  | -0.03122 | 1.26E-02  | 0.9958        |
| 4:prukoh-5:konpar | -0.02134 | -0.04392 | 1.24E-03  | <b>0.0922</b> |
| 5:prukoh-5:konpar | 0.008324 | -0.01857 | 3.52E-02  | 1.0000        |
| 7:prukoh-5:konpar | -0.01453 | -0.04349 | 1.44E-02  | 0.9705        |
| 6:prukoh-5:konpar | -0.0615  | -0.09928 | -2.37E-02 | <b>0.0000</b> |
| 6:konpar-7:konpar | 0.016084 | -0.00606 | 3.82E-02  | 0.5321        |
| 3:prukoh-7:konpar | 0.01254  | -0.01033 | 3.54E-02  | 0.9299        |
| 1:prukoh-7:konpar | 0.050865 | 0.02709  | 7.46E-02  | <b>0.0000</b> |
| 2:prukoh-7:konpar | 0.014254 | -0.00808 | 3.66E-02  | 0.7695        |
| 4:prukoh-7:konpar | 0.002215 | -0.02077 | 2.52E-02  | 1.0000        |

|                   |          |          |           |               |
|-------------------|----------|----------|-----------|---------------|
| 5:prukoh-7:konpar | 0.031877 | 0.004642 | 5.91E-02  | <b>0.0053</b> |
| 7:prukoh-7:konpar | 0.009024 | -0.02025 | 3.83E-02  | 1.0000        |
| 6:prukoh-7:konpar | -0.03794 | -0.07598 | 8.89E-05  | 0.0514        |
| 3:prukoh-6:konpar | -0.00354 | -0.02738 | 2.03E-02  | 1.0000        |
| 1:prukoh-6:konpar | 0.034781 | 0.010074 | 5.95E-02  | <b>0.0001</b> |
| 2:prukoh-6:konpar | -0.00183 | -0.02516 | 2.15E-02  | 1.0000        |
| 4:prukoh-6:konpar | -0.01387 | -0.03782 | 1.01E-02  | 0.8876        |
| 5:prukoh-6:konpar | 0.015793 | -0.01226 | 4.38E-02  | 0.9112        |
| 7:prukoh-6:konpar | -0.00706 | -0.0371  | 2.30E-02  | 1.0000        |
| 6:prukoh-6:konpar | -0.05403 | -0.09265 | -1.54E-02 | <b>0.0001</b> |
| 1:prukoh-3:prukoh | 0.038325 | 0.012961 | 6.37E-02  | <b>0.0000</b> |
| 2:prukoh-3:prukoh | 0.001714 | -0.02231 | 2.57E-02  | 1.0000        |
| 4:prukoh-3:prukoh | -0.01032 | -0.03495 | 1.43E-02  | 0.9964        |
| 5:prukoh-3:prukoh | 0.019338 | -0.0093  | 4.80E-02  | 0.6747        |
| 7:prukoh-3:prukoh | -0.00352 | -0.0341  | 2.71E-02  | 1.0000        |
| 6:prukoh-3:prukoh | -0.05048 | -0.08953 | -1.14E-02 | <b>0.0008</b> |
| 2:prukoh-1:prukoh | -0.03661 | -0.06149 | -1.17E-02 | <b>0.0000</b> |
| 4:prukoh-1:prukoh | -0.04865 | -0.07412 | -2.32E-02 | <b>0.0000</b> |
| 5:prukoh-1:prukoh | -0.01899 | -0.04835 | 1.04E-02  | 0.7487        |
| 7:prukoh-1:prukoh | -0.04184 | -0.0731  | -1.06E-02 | <b>0.0004</b> |
| 6:prukoh-1:prukoh | -0.08881 | -0.12839 | -4.92E-02 | <b>0.0000</b> |
| 4:prukoh-2:prukoh | -0.01204 | -0.03617 | 1.21E-02  | 0.9722        |
| 5:prukoh-2:prukoh | 0.017623 | -0.01058 | 4.58E-02  | 0.8001        |
| 7:prukoh-2:prukoh | -0.00523 | -0.03541 | 2.50E-02  | 1.0000        |
| 6:prukoh-2:prukoh | -0.0522  | -0.09093 | -1.35E-02 | <b>0.0003</b> |
| 5:prukoh-4:prukoh | 0.029662 | 0.000935 | 5.84E-02  | <b>0.0339</b> |
| 7:prukoh-4:prukoh | 0.006809 | -0.02386 | 3.75E-02  | 1.0000        |
| 6:prukoh-4:prukoh | -0.04016 | -0.07927 | -1.04E-03 | <b>0.0364</b> |
| 7:prukoh-5:prukoh | -0.02285 | -0.05682 | 1.11E-02  | 0.6817        |
| 6:prukoh-5:prukoh | -0.06982 | -0.11157 | -2.81E-02 | <b>0.0000</b> |
| 6:prukoh-7:prukoh | -0.04697 | -0.09008 | -3.86E-03 | <b>0.0164</b> |

Table S3. Summary statistics for the anchored assembly. For each cross and for the combined pseudomolecule assembly the number of scaffolds, those with at least 2 markers, those with at least two markers that are > 0.1 cM apart, the combined size of the anchored scaffolds, the N50, and the average coverage are shown per LG.

| LG            | # scaffolds | # scaffolds >= 2 markers | # scaffolds >=2 well-spaced markers | Size (bp) | N50 (bp) | coverage |
|---------------|-------------|--------------------------|-------------------------------------|-----------|----------|----------|
| <b>ParKoh</b> |             |                          |                                     |           |          |          |
| 1             | 117         | 21                       | 14                                  | 106312036 | 1301586  | 52.89792 |
| 2             | 89          | 8                        | 4                                   | 59124686  | 886001   | 54.757   |

|                 |      |     |     |           |         |             |
|-----------------|------|-----|-----|-----------|---------|-------------|
| 3               | 109  | 14  | 12  | 98715872  | 1184645 | 51.15361    |
| 4               | 49   | 1   | 1   | 39589978  | 1093907 | 54.17022    |
| 5               | 76   | 18  | 16  | 62735740  | 1197186 | 66.5671     |
| 6               | 47   | 7   | 6   | 19057194  | 730017  | 57.78891    |
| 7               | 45   | 6   | 5   | 38543039  | 1485176 | 60.40972    |
| X               | 76   | 4   | 2   | 84017840  | 1519936 | 29.56227    |
| Sum/median      | 608  | 79  | 60  | 508096385 | 1190916 | 53.41334375 |
| <b>KonPar</b>   |      |     |     |           |         |             |
| 1               | 128  | 17  | 13  | 103734776 | 1143465 | 37.22859    |
| 2               | 132  | 17  | 10  | 95158272  | 1019600 | 40.18552    |
| 3               | 143  | 22  | 19  | 134318749 | 1355019 | 34.98008    |
| 4               | 109  | 24  | 12  | 110192983 | 1660236 | 40.38131    |
| 5               | 84   | 13  | 9   | 67417874  | 1136159 | 44.86084    |
| 6               | 64   | 7   | 6   | 23922075  | 733389  | 46.43391    |
| 7               | 77   | 17  | 13  | 58701654  | 1180700 | 38.07606    |
| X               | 86   | 14  | 3   | 98541466  | 1540389 | 25.64274    |
| Sum/median      | 823  | 131 | 85  | 691987849 | 1162083 | 38.47363125 |
| <b>PruKoh</b>   |      |     |     |           |         |             |
| 1               | 50   | 5   | 3   | 46785714  | 1325001 | 41.55226    |
| 2               | 62   | 4   | 3   | 45819772  | 1106261 | 47.8152     |
| 3               | 57   | 2   | 2   | 54629290  | 1375220 | 40.13577    |
| 4               | 56   | 11  | 5   | 60827800  | 2025849 | 45.12183    |
| 5               | 33   | 3   | 2   | 20743600  | 725518  | 51.94363    |
| 6               | 14   | 0   | 0   | 7779385   | 859092  | 45.60227    |
| 7               | 27   | 4   | 2   | 17783624  | 1224531 | 49.36982    |
| X               | 84   | 9   | 0   | 82253003  | 1268875 | 28.72471    |
| Sum/median      | 383  | 38  | 17  | 336622188 | 1246703 | 43.78318625 |
| <b>Combined</b> |      |     |     |           |         |             |
| 1               | 167  | 43  | 30  | 117180395 | 1089296 |             |
| 2               | 170  | 29  | 17  | 101876544 | 816734  |             |
| 3               | 175  | 38  | 33  | 137279277 | 1044733 |             |
| 4               | 118  | 36  | 18  | 89703238  | 957048  |             |
| 5               | 102  | 34  | 27  | 62192538  | 880080  |             |
| 6               | 80   | 14  | 12  | 25387579  | 569059  |             |
| 7               | 88   | 27  | 20  | 52742540  | 916807  |             |
| X               | 154  | 27  | 5   | 133989488 | 1249941 |             |
| Sum/median      | 1054 | 248 | 162 | 720351599 | 936928  |             |

Table S4. Integrated AFLP and SNP map for the *L. kohalensis* x *L. paranigra* cross. The highlighted AFLP markers are located under a QTL peak in the Shaw & Lesnick 2009 study. The highlighted AFLP markers on linkage group 1 indicate the location where a male song and female preference QTL peak co-localize.

| scaffold | locus           | LG | position (cM) | AFLP        | scaffold midpoint position (bp) |
|----------|-----------------|----|---------------|-------------|---------------------------------|
| S002761  | S002761_729410  | 1  | 0             | NA          | 106423286                       |
|          | as030           | 1  | 1.821         | PaggcA53    | NA                              |
|          | as074           | 1  | 3.282         | PggacA54    | NA                              |
|          | ac007           | 1  | 6.09          | PagacA52B55 | NA                              |
|          | ac013           | 1  | 7.301         | PcgacA51B51 | NA                              |
|          | ac017           | 1  | 8.604         | PgcacA07B54 | NA                              |
| S000817  | S000817_120415  | 1  | 9.734         | NA          | 114208815                       |
| S002077  | S002077_311803  | 1  | 11.288        | NA          | 109788919                       |
| S007909  | S007909_155126  | 1  | 13.752        | NA          | 104812030                       |
|          | as087           | 1  | 23.642        | PgtgcA54    | NA                              |
|          | as081           | 1  | 25.658        | PgtacA56    | NA                              |
|          | as085_x         | 1  | 30.736        | PgtgcA3     | NA                              |
|          | as080           | 1  | 36.928        | PgtacA55    | NA                              |
|          | as023           | 1  | 38.868        | PaaacA63    | NA                              |
| S001330  | S001330_135948  | 1  | 42.507        | NA          | 100949675                       |
| S001771  | S001771_116507  | 1  | 46.906        | NA          | 105601414                       |
| S000392  | S000392_74030   | 1  | 51.737        | NA          | NA                              |
| S001680  | S001680_315523  | 1  | 52.615        | NA          | 88172650                        |
| S000409  | S000409_474112  | 1  | 53.517        | NA          | 84174036                        |
| S001489  | S001489_769426  | 1  | 56.166        | NA          | 41585373                        |
| S004205  | S004205_29098   | 1  | 57.827        | NA          | 50498860                        |
| S000949  | S000949_205067  | 1  | 58.259        | NA          | 42520204                        |
| S008139  | S008139_68543   | 1  | 58.542        | NA          | NA                              |
| S000696  | S000696_137337  | 1  | 58.549        | NA          | NA                              |
| S002946  | S002946_738803  | 1  | 58.707        | NA          | 67349798                        |
| C120306  | C120306_385     | 1  | 58.847        | NA          | NA                              |
| S006572  | S006572_95801   | 1  | 58.928        | NA          | 46181571                        |
| S001914  | S001914_404347  | 1  | 59.118        | NA          | 66160290                        |
| S009296  | S009296_110864  | 1  | 59.329        | NA          | 65039174                        |
| S000663  | S000663_611964  | 1  | 59.641        | NA          | 53947499                        |
| S004747  | S004747_292840  | 1  | 59.784        | NA          | 49933664                        |
| S000671  | S000671_1033505 | 1  | 61.079        | NA          | NA                              |
| S001489  | S001489_639186  | 1  | 61.694        | NA          | 41585373                        |
| S004313  | S004313_69835   | 1  | 61.699        | NA          | 40812282                        |
| S002548  | S002548_423714  | 1  | 62.493        | NA          | 45749393                        |
| S000105  | S000105_348801  | 1  | 63.591        | NA          | 36945493                        |

|         |                 |   |         |             |          |
|---------|-----------------|---|---------|-------------|----------|
| S004771 | S004771_628132  | 1 | 64.917  | NA          | 31081394 |
| S004771 | S004771_1175996 | 1 | 65.21   | NA          | 31081394 |
| S002151 | S002151_1377807 | 1 | 66.292  | NA          | 22870317 |
|         | as034           | 1 | 68.191  | PatgcA52    | NA       |
|         | as012           | 1 | 70.107  | PccacA55    | NA       |
|         | ac014           | 2 | 0       | PgaacA10B60 | NA       |
| S001206 | S001206_1546586 | 2 | 2.303   | NA          | 1821533  |
| S000518 | S000518_766492  | 2 | 6.245   | NA          | 6192438  |
|         | as077           | 2 | 26.628  | PgggcA52    | NA       |
| S003191 | S003191_528616  | 2 | 31.612  | NA          | 16874625 |
| S001838 | S001838_6021    | 2 | 42.989  | NA          | 23233385 |
| S000416 | S000416_552586  | 2 | 47.133  | NA          | 24694735 |
| S004218 | S004218_23553   | 2 | 51.627  | NA          | 31927917 |
| S001550 | S001550_214202  | 2 | 52.41   | NA          | 33996652 |
| S003798 | S003798_463488  | 2 | 53.5    | NA          | 36725738 |
| S002376 | S002376_431585  | 2 | 54.951  | NA          | 38303813 |
|         | as052           | 2 | 57.787  | PgggcA53    | NA       |
| S005289 | S005289_526503  | 2 | 58.474  | NA          | 45049140 |
| S000230 | S000230_200879  | 2 | 58.756  | NA          | 46073354 |
| S002156 | S002156_413885  | 2 | 61.643  | NA          | 90147661 |
| S003079 | S003079_192141  | 2 | 61.705  | NA          | 56392065 |
| S004728 | S004728_52289   | 2 | 61.99   | NA          | 77439224 |
| S001050 | S001050_43796   | 2 | 62.025  | NA          | 71210412 |
| S001881 | S001881_642832  | 2 | 62.193  | NA          | 60129008 |
| S003118 | S003118_235274  | 2 | 62.379  | NA          | 56724422 |
| S003735 | S003735_82587   | 2 | 62.896  | NA          | NA       |
|         | ac006           | 2 | 63.793  | PacacA56B69 | NA       |
|         | as040_x         | 2 | 64.823  | PcagcA08    | NA       |
| S003067 | S003067_20757   | 2 | 67.28   | NA          | 80842581 |
| S000199 | S000199_193260  | 2 | 74.457  | NA          | 83353553 |
| S001797 | S001797_1827615 | 2 | 75.671  | NA          | 85052994 |
| S001855 | S001855_342231  | 2 | 82.018  | NA          | 89412353 |
| S004792 | S004792_152639  | 2 | 85.245  | NA          | NA       |
| S001901 | S001901_315332  | 2 | 87.985  | NA          | 94264609 |
| S001602 | S001602_266912  | 2 | 109.791 | NA          | 99970919 |
| S000793 | S000793_627068  | 2 | 116.258 | NA          | NA       |
|         | as115           | 3 | 0       | PttacA54    | NA       |
|         | as083           | 3 | 3.848   | PgtacA58    | NA       |
| S001338 | S001338_29965   | 3 | 5.698   | NA          | 168668   |
|         | as037           | 3 | 9.753   | PcaacA57    | NA       |
| S000075 | S000075_156551  | 3 | 11.248  | NA          | 1642392  |

|         |                 |   |        |             |           |
|---------|-----------------|---|--------|-------------|-----------|
| S002528 | S002528_794391  | 3 | 19.911 | NA          | 18001031  |
| S009989 | S009989_70944   | 3 | 21.779 | NA          | 6045815   |
| S002528 | S002528_794393  | 3 | 23.255 | NA          | 18001031  |
| S005403 | S005403_7134    | 3 | 27.914 | NA          | 18662141  |
|         | ac009_a         | 3 | 48.316 | PaggcA07B19 | NA        |
|         | as063           | 3 | 49.481 | PgaacA60    | NA        |
|         | as064           | 3 | 51.877 | PgaacA61    | NA        |
|         | as025           | 3 | 53.754 | PaagcA57    | NA        |
| S000558 | S000558_1959639 | 3 | 59.995 | NA          | 40534699  |
| S000558 | S000558_1232157 | 3 | 60.337 | NA          | 40534699  |
|         | as088           | 3 | 63.867 | PgtgcA55    | NA        |
|         | as069           | 3 | 64.465 | PgcacA51    | NA        |
|         | ad100.as079     | 3 | 65.149 | NA          | NA        |
| S004777 | S004777_221108  | 3 | 66.442 | NA          | 36430961  |
| S000558 | S000558_748836  | 3 | 66.865 | NA          | 40534699  |
| S007419 | S007419_788393  | 3 | 67.162 | NA          | 42061284  |
| S002934 | S002934_242739  | 3 | 68.016 | NA          | 56760880  |
| S003072 | S003072_393178  | 3 | 68.244 | NA          | 63064570  |
| S001785 | S001785_133632  | 3 | 68.301 | NA          | 60906412  |
| S000726 | S000726_1782089 | 3 | 68.399 | NA          | 48678466  |
| S000529 | S000529_530363  | 3 | 68.572 | NA          | 72186930  |
|         | as108_a         | 3 | 68.59  | PtgacA03    | NA        |
| S002665 | S002665_282741  | 3 | 68.951 | NA          | NA        |
| S005483 | S005483_46807   | 3 | 69.079 | NA          | 62650842  |
| S013086 | S013086_40139   | 3 | 69.12  | NA          | NA        |
| S002194 | S002194_96231   | 3 | 69.157 | NA          | 66669112  |
| S006750 | S006750_274965  | 3 | 69.245 | NA          | NA        |
| S004654 | S004654_237626  | 3 | 69.303 | NA          | NA        |
| S002002 | S002002_376411  | 3 | 69.412 | NA          | 44975632  |
| S003472 | S003472_9538    | 3 | 70.555 | NA          | 82404642  |
| S002613 | S002613_31096   | 3 | 71.526 | NA          | NA        |
| S001060 | S001060_728231  | 3 | 72.259 | NA          | 89191537  |
| S002297 | S002297_775779  | 3 | 72.322 | NA          | 91133138  |
| S001060 | S001060_1929755 | 3 | 72.461 | NA          | 89191537  |
| S006865 | S006865_338439  | 3 | 72.867 | NA          | 101275163 |
|         | as101           | 3 | 73.62  | PtcgcA09    | NA        |
| S001265 | S001265_211884  | 3 | 74.555 | NA          | 106649134 |
| S000385 | S000385_1480834 | 3 | 75.848 | NA          | 108764126 |
| S001106 | S001106_481878  | 3 | 82.071 | NA          | 114989880 |
|         | as114_ax        | 3 | 86.713 | PttacA02    | NA        |
| S001275 | S001275_1127865 | 3 | 88.98  | NA          | 122746700 |

|         |                 |   |        |             |           |
|---------|-----------------|---|--------|-------------|-----------|
| S002311 | S002311 254807  | 3 | 89.321 | NA          | 123571440 |
|         | as076 a         | 4 | 0      | PgggcA01    | NA        |
|         | as073 a         | 4 | 1.753  | PggacA01    | NA        |
| S005844 | S005844 224400  | 4 | 18.591 | NA          | 4097279   |
|         | as117 a         | 4 | 41.053 | PttacA06    | NA        |
|         | as099           | 4 | 41.551 | PtcacA54    | NA        |
| S001783 | S001783 279356  | 4 | 43.04  | NA          | 63112104  |
| S000590 | S000590 1997032 | 4 | 43.249 | NA          | 29331168  |
| S014891 | S014891 36875   | 4 | 43.589 | NA          | NA        |
| S003206 | S003206 599818  | 4 | 43.711 | NA          | NA        |
| S000836 | S000836 228275  | 4 | 43.801 | NA          | NA        |
| S000679 | S000679 623688  | 4 | 43.895 | NA          | 57825201  |
|         | as075 a         | 4 | 44.445 | PggacA13    | NA        |
| S002196 | S002196 584574  | 4 | 44.674 | NA          | 42514727  |
| S001005 | S001005 1065597 | 4 | 44.857 | NA          | 39878575  |
| S003635 | S003635 7993    | 4 | 45.443 | NA          | 63978342  |
| S009873 | S009873 154713  | 4 | 49.074 | NA          | 71866807  |
| S002058 | S002058 706797  | 4 | 49.408 | NA          | 72523035  |
| S000455 | S000455 692625  | 4 | 52.283 | NA          | 73544308  |
|         | as029 a         | 4 | 61.5   | PagacA5     | NA        |
| S001486 | S001486 61579   | 4 | 64.17  | NA          | 77623428  |
|         | as028 x         | 4 | 65.829 | PagacA1     | NA        |
| S001279 | S001279 277406  | 4 | 67.269 | NA          | 78135382  |
| S001608 | S001608 399358  | 4 | 83.462 | NA          | 89198891  |
|         | as021           | 5 | 0      | PaaacA54    | NA        |
| S005326 | S005326 57790   | 5 | 1.807  | NA          | 466530    |
|         | ac016           | 5 | 2.394  | PgagcA56B62 | NA        |
|         | ac011           | 5 | 4.24   | PcagcA52B53 | NA        |
|         | ac015           | 5 | 5.865  | PgaacA62B66 | NA        |
|         | as116 a         | 5 | 7.016  | PttacA05    | NA        |
| S002190 | S002190 273188  | 5 | 13.671 | NA          | 3452268   |
|         | as100           | 5 | 15.717 | PtcgcA54    | NA        |
| S000809 | S000809 365747  | 5 | 19.221 | NA          | 6005121   |
|         | as066 a         | 5 | 21.423 | PgagcA08    | NA        |
|         | as027 a         | 5 | 25.245 | PacacA06    | NA        |
|         | ad082.as062     | 5 | 26.337 | NA          | NA        |
|         | as045           | 5 | 27.055 | PccacA53    | NA        |
| S004462 | S004462 54127   | 5 | 28.207 | NA          | 13078451  |
| S005610 | S005610 84211   | 5 | 28.338 | NA          | 13179099  |
| S000366 | S000366 42046   | 5 | 28.803 | NA          | 17964325  |
| S000745 | S000745 339612  | 5 | 30.425 | NA          | 21039003  |

|         |                 |   |        |             |          |
|---------|-----------------|---|--------|-------------|----------|
| S002565 | S002565_116928  | 5 | 33.166 | NA          | 22902902 |
| S004683 | S004683_48328   | 5 | 34.768 | NA          | 24389284 |
| S006506 | S006506_7146    | 5 | 35.301 | NA          | 27839633 |
| S005519 | S005519_111372  | 5 | 37.975 | NA          | 32385211 |
| S000305 | S000305_70577   | 5 | 40.26  | NA          | 33073185 |
| S000979 | S000979_164421  | 5 | 41.485 | NA          | 35633669 |
| S005459 | S005459_70152   | 5 | 42.698 | NA          | 37847956 |
| S000180 | S000180_656202  | 5 | 44.503 | NA          | 40272446 |
| S021890 | S021890_296     | 5 | 45.368 | NA          | 42534517 |
|         | as068           | 5 | 46.655 | PgagcA51    | NA       |
| S005334 | S005334_732385  | 5 | 48.033 | NA          | 43080568 |
| S005064 | S005064_175253  | 5 | 49.954 | NA          | 45035858 |
|         | as091           | 5 | 52.052 | PtaacA51    | NA       |
| S003838 | S003838_738497  | 5 | 54.849 | NA          | 46738481 |
| S001560 | S001560_398299  | 5 | 59.376 | NA          | 50508185 |
| S004681 | S004681_23198   | 5 | 61.431 | NA          | 53592894 |
|         | as057           | 5 | 62.937 | PctacA55    | NA       |
|         | as058           | 5 | 63.812 | PctacA56    | NA       |
|         | as059           | 5 | 65.211 | PctacA57    | NA       |
|         | as043           | 5 | 71.183 | PcagcA51    | NA       |
|         | as118_x         | 5 | 72.676 | PttacA13    | NA       |
|         | as041           | 5 | 73.969 | PcagcA56    | NA       |
| S007270 | S007270_308120  | 5 | 76.332 | NA          | 58235091 |
| S002503 | S002503_741242  | 5 | 77.495 | NA          | 58956874 |
|         | as110           | 6 | 0      | PtggcA52    | NA       |
|         | as047_x         | 6 | 1.51   | PcgacA02    | NA       |
| S001034 | S001034_78522   | 6 | 2.72   | NA          | 24400658 |
| S022584 | S022584_1139    | 6 | 5.895  | NA          | 23964288 |
|         | as105           | 6 | 6.664  | PtgacA58    | NA       |
| S005236 | S005236_14409   | 6 | 7.404  | NA          | 16442306 |
| S001507 | S001507_262717  | 6 | 8.078  | NA          | 13978219 |
| S002799 | S002799_37080   | 6 | 10.159 | NA          | 22063251 |
|         | ac003           | 6 | 11.251 | PaagcA61B63 | NA       |
|         | ac019           | 6 | 13.745 | PtgacA57B60 | NA       |
| S001904 | S001904_134885  | 6 | 15.337 | NA          | 16620760 |
|         | as109           | 6 | 17.735 | PtgacA56    | NA       |
|         | as039           | 6 | 20.554 | PcagcA54    | NA       |
| S000218 | S000218_4280    | 6 | 21.865 | NA          | 10002544 |
| S001761 | S001761_1745572 | 6 | 27.303 | NA          | 6635712  |
| S005439 | S005439_103276  | 6 | 35.966 | NA          | 4315651  |
| S011721 | S011721_76537   | 6 | 47.364 | NA          | 849742   |

|         |                 |   |        |          |          |
|---------|-----------------|---|--------|----------|----------|
| S003103 | S003103_949190  | 7 | 0      | NA       | 1904957  |
| S008107 | S008107_29859   | 7 | 3.613  | NA       | 2842152  |
| S003103 | S003103_1019194 | 7 | 3.994  | NA       | 1904957  |
| S000557 | S000557_589404  | 7 | 7.085  | NA       | 3829489  |
| S002304 | S002304_728504  | 7 | 9.873  | NA       | 4666925  |
| S002736 | S002736_346176  | 7 | 10.997 | NA       | 5494164  |
| S002736 | S002736_115345  | 7 | 12.279 | NA       | 5494164  |
| S014172 | S014172_53634   | 7 | 13.346 | NA       | 5971292  |
| S000628 | S000628_1159720 | 7 | 17.535 | NA       | 8386281  |
| S000628 | S000628_169050  | 7 | 18.732 | NA       | 8386281  |
|         | as033           | 7 | 21.278 | PatacA55 | NA       |
|         | as071_a         | 7 | 22.74  | PgcgcA11 | NA       |
| S000677 | S000677_527760  | 7 | 24.152 | NA       | 12625625 |
|         | as070_a         | 7 | 26.358 | PgcacA10 | NA       |
| S002087 | S002087_530732  | 7 | 44.525 | NA       | 31673319 |
| S004909 | S004909_906373  | 7 | 50.728 | NA       | 39335421 |
| S010292 | S010292_145463  | 7 | 53.418 | NA       | 40115847 |
| S004220 | S004220_129736  | 7 | 53.983 | NA       | 43031005 |
| S001469 | S001469_584893  | 7 | 65.118 | NA       | 50836753 |
| S002493 | S002493_175861  | 7 | 67.129 | NA       | 48491131 |
|         | xs032_x         | X | 0      | PttacA04 | NA       |
| S000571 | S000571_30159   | X | 2.403  | NA       | 4915702  |
|         | xd024           | X | 11.115 | PtagcB55 | NA       |
| S001780 | S001780_509180  | X | 24.446 | NA       | 10902308 |
|         | xd004           | X | 25.132 | PatacB52 | NA       |
|         | xs020           | X | 29.168 | PatgcA56 | NA       |
| S000766 | S000766_827724  | X | 30.52  | NA       | 11869181 |
| S000360 | S000360_70566   | X | 32.459 | NA       | 17072014 |
| S003455 | S003455_1122569 | X | 35.526 | NA       | 19186595 |
| S004887 | S004887_81621   | X | 42.013 | NA       | NA       |
|         | xs024_x         | X | 43.011 | PcggcA10 | NA       |
| S000604 | S000604_43741   | X | 43.459 | NA       | NA       |
| S000648 | S000648_2315784 | X | 44.883 | NA       | 34819414 |
| S000219 | S000219_2024096 | X | 45.729 | NA       | 26925418 |
| S000777 | S000777_1339236 | X | 46.733 | NA       | 30344332 |
| S000777 | S000777_461461  | X | 46.887 | NA       | 30344332 |
| S000648 | S000648_2255296 | X | 47.453 | NA       | 34819414 |
| S001873 | S001873_641123  | X | 49.384 | NA       | 36757980 |
|         | xd016_x         | X | 49.672 | PatgcB02 | NA       |
| S001241 | S001241_171252  | X | 53.266 | NA       | 44632865 |
| S003053 | S003053_264327  | X | 55.937 | NA       | 56937852 |

|         |                 |   |         |          |           |
|---------|-----------------|---|---------|----------|-----------|
| S000327 | S000327_278424  | X | 56.293  | NA       | 55828014  |
| S000470 | S000470_76715   | X | 56.911  | NA       | 59714238  |
|         | xd008_x         | X | 57.404  | PgggcB22 | NA        |
| S003307 | S003307_279141  | X | 57.747  | NA       | 63486064  |
| S001912 | S001912_587919  | X | 58.069  | NA       | 62108629  |
| S000965 | S000965_1228070 | X | 59.663  | NA       | 73444967  |
| S000808 | S000808_1583160 | X | 59.672  | NA       | 69248171  |
| S006304 | S006304_697561  | X | 59.908  | NA       | NA        |
| S013985 | S013985_11114   | X | 60.241  | NA       | 82920002  |
|         | xd020           | X | 63.263  | PcggcB53 | NA        |
| S007907 | S007907_144642  | X | 64.648  | NA       | 94604867  |
|         | xs011           | X | 67.511  | PaaacA60 | NA        |
| S001930 | S001930_1745657 | X | 68.641  | NA       | 88122926  |
| S001930 | S001930_2410442 | X | 69.247  | NA       | 88122926  |
| S004832 | S004832_609791  | X | 70.344  | NA       | 91521965  |
| S001247 | S001247_68215   | X | 71.108  | NA       | 92776928  |
|         | xs012           | X | 75.227  | PaagcA53 | NA        |
| S000238 | S000238_1169086 | X | 90.242  | NA       | 113789231 |
| S003071 | S003071_613045  | X | 95.05   | NA       | 116953618 |
| S002737 | S002737_694631  | X | 117.43  | NA       | NA        |
| S000176 | S000176_35913   | X | 126.585 | NA       | 132559092 |
| S001187 | S001187_211572  | X | 130.879 | NA       | 127829472 |
| S003230 | S003230_1425064 | X | 131.437 | NA       | 129558233 |
| S002008 | S002008_1089204 | X | 131.468 | NA       | 126707516 |

## FIGURES

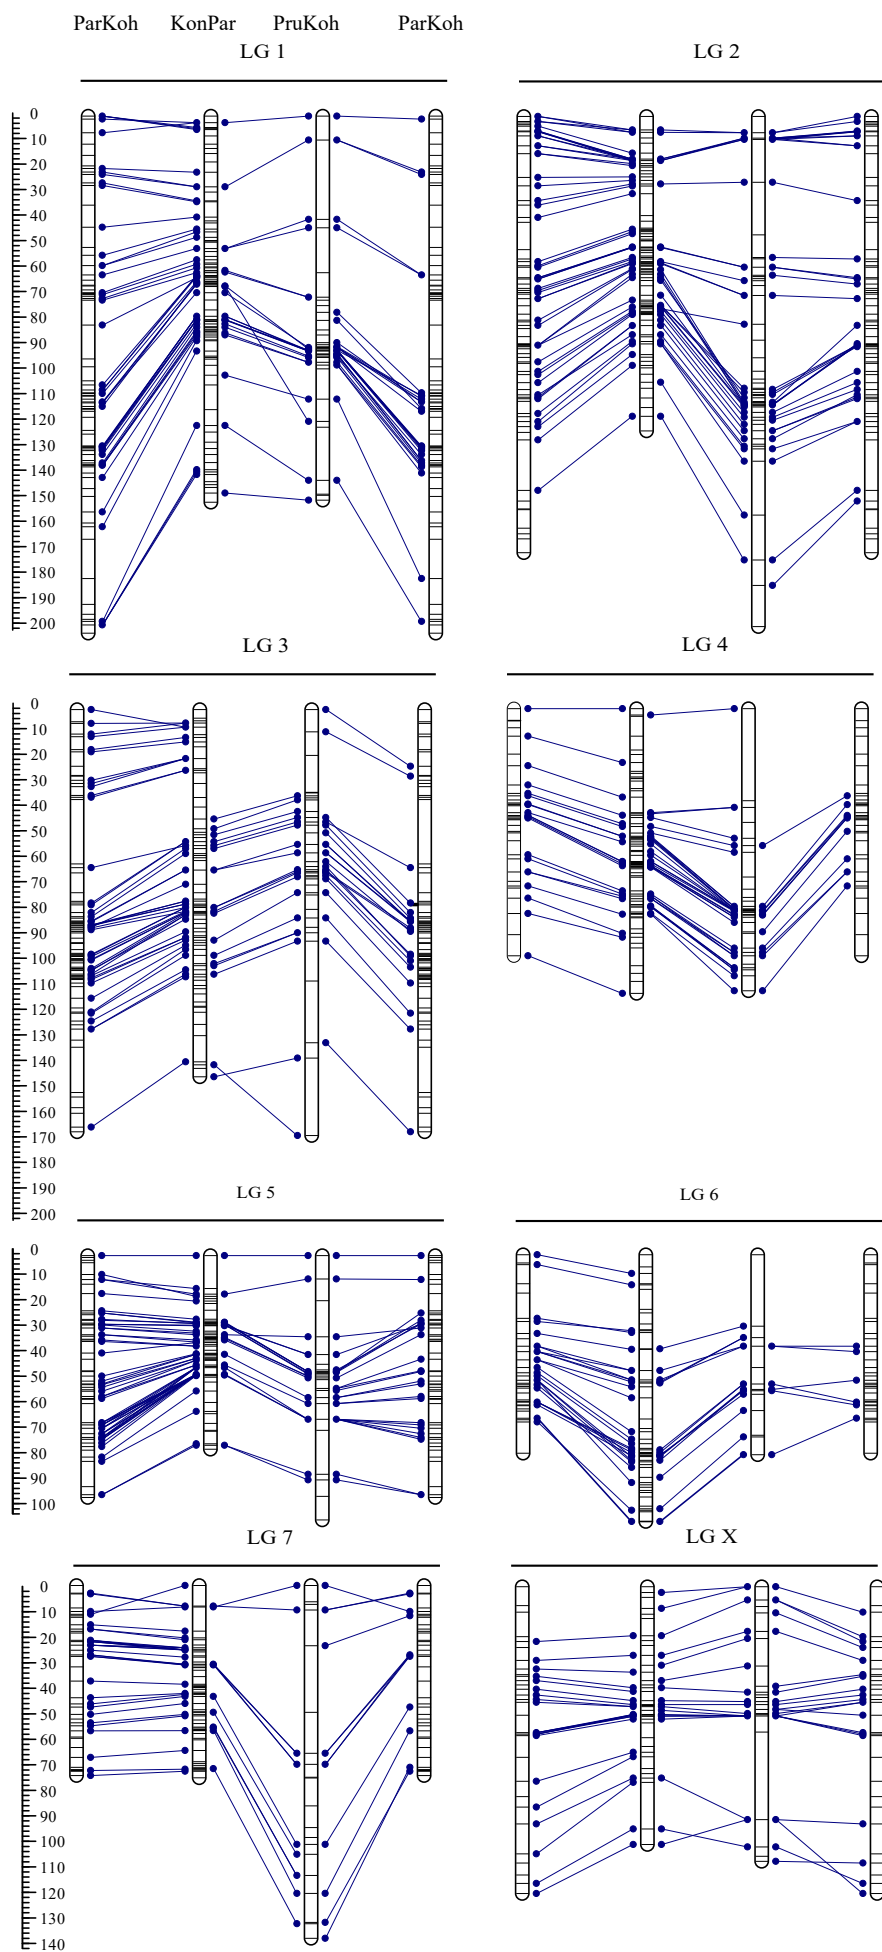

Figure S1. Comprehensive linkage maps. Bars represent linkage groups (LG) for ParKoh, KonPar, and PruKoh. Lines within the bars indicate marker positions. The scale on the left measures marker spacing in cM. Blue lines connect markers on the same scaffold between the different maps. The map for ParKoh is shown twice to facilitate comparison across all three maps.

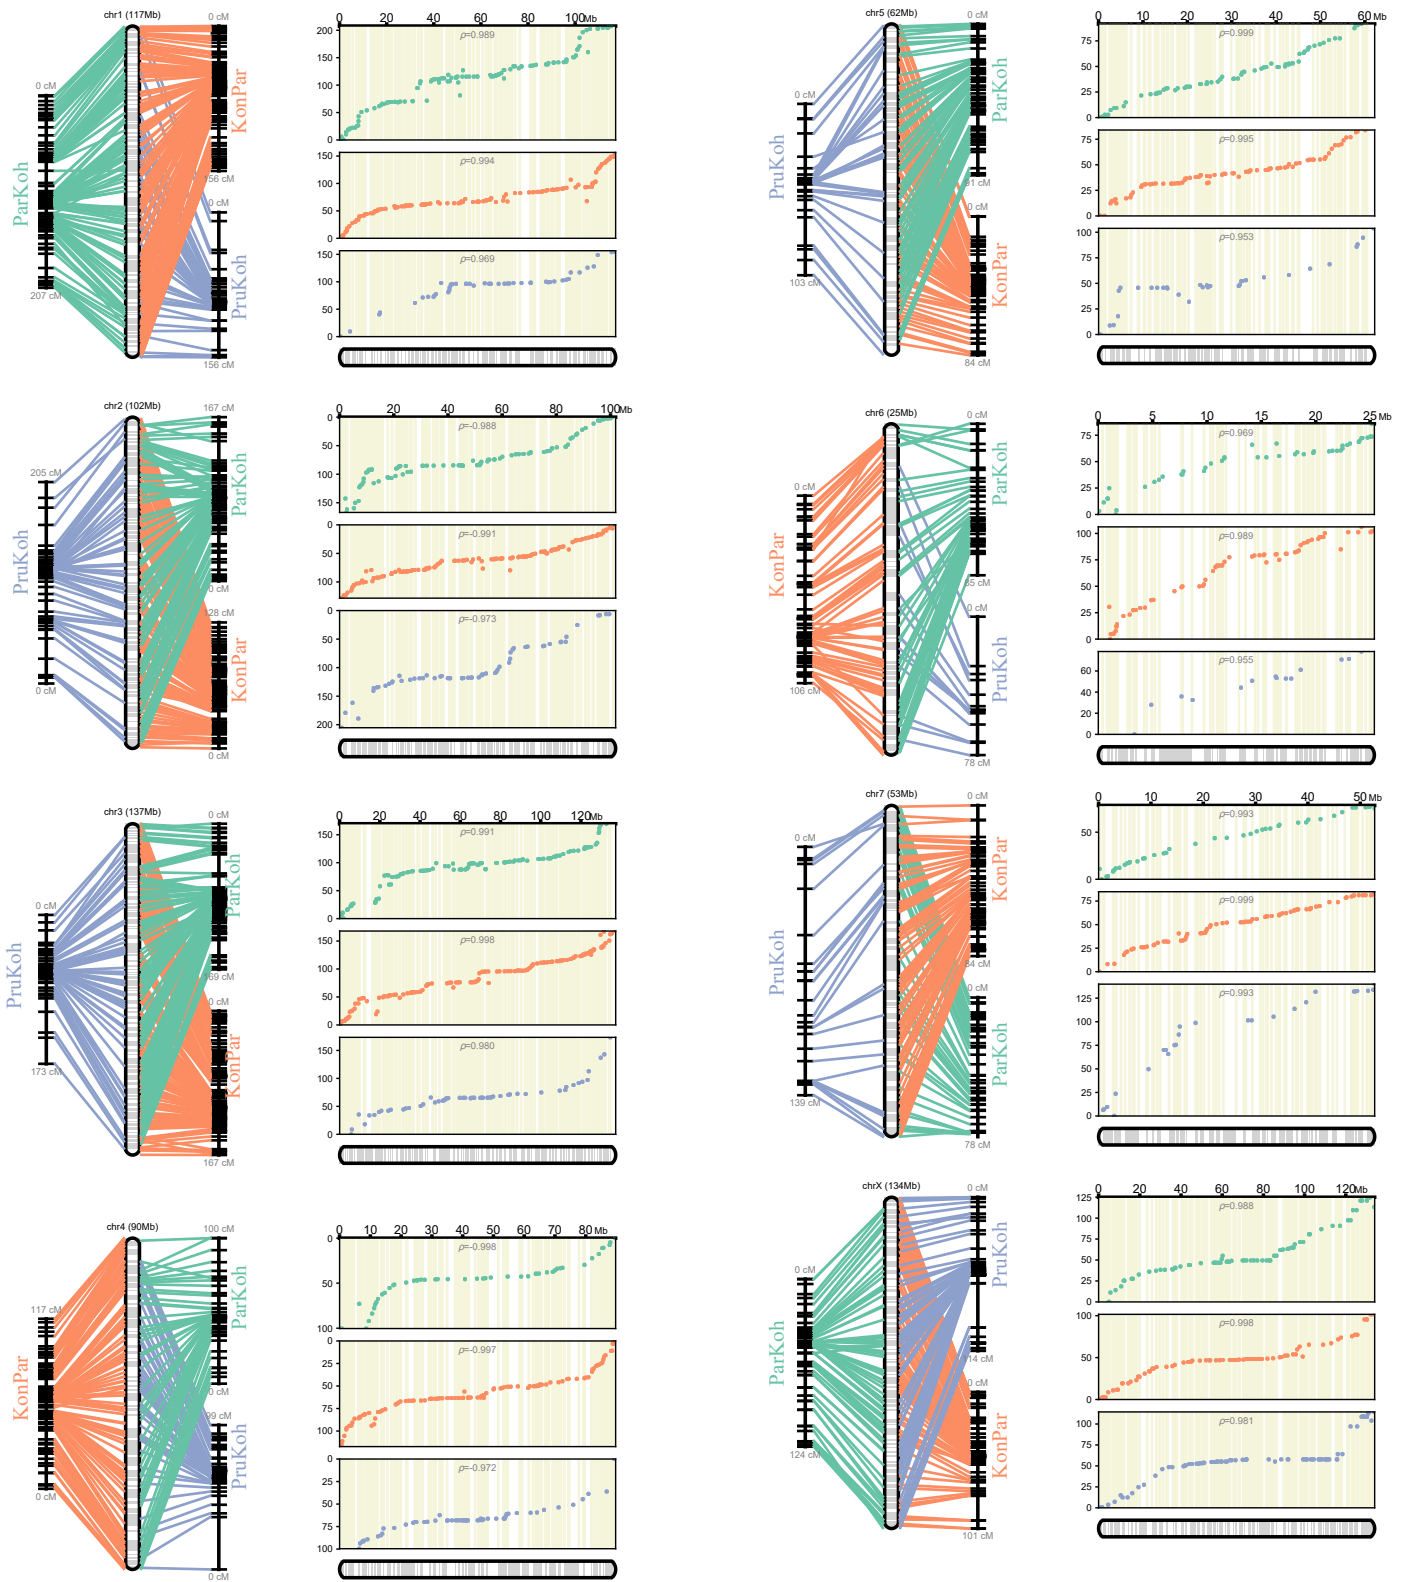

Figure S2. ALLMAPS output. For each of the linkage groups (chr) the relative order with respect to the shared map (i.e. the pseudomolecule assembly) is shown as well as Spearman's rho ( $\rho$ ) for the strength of correlation between marker orders.

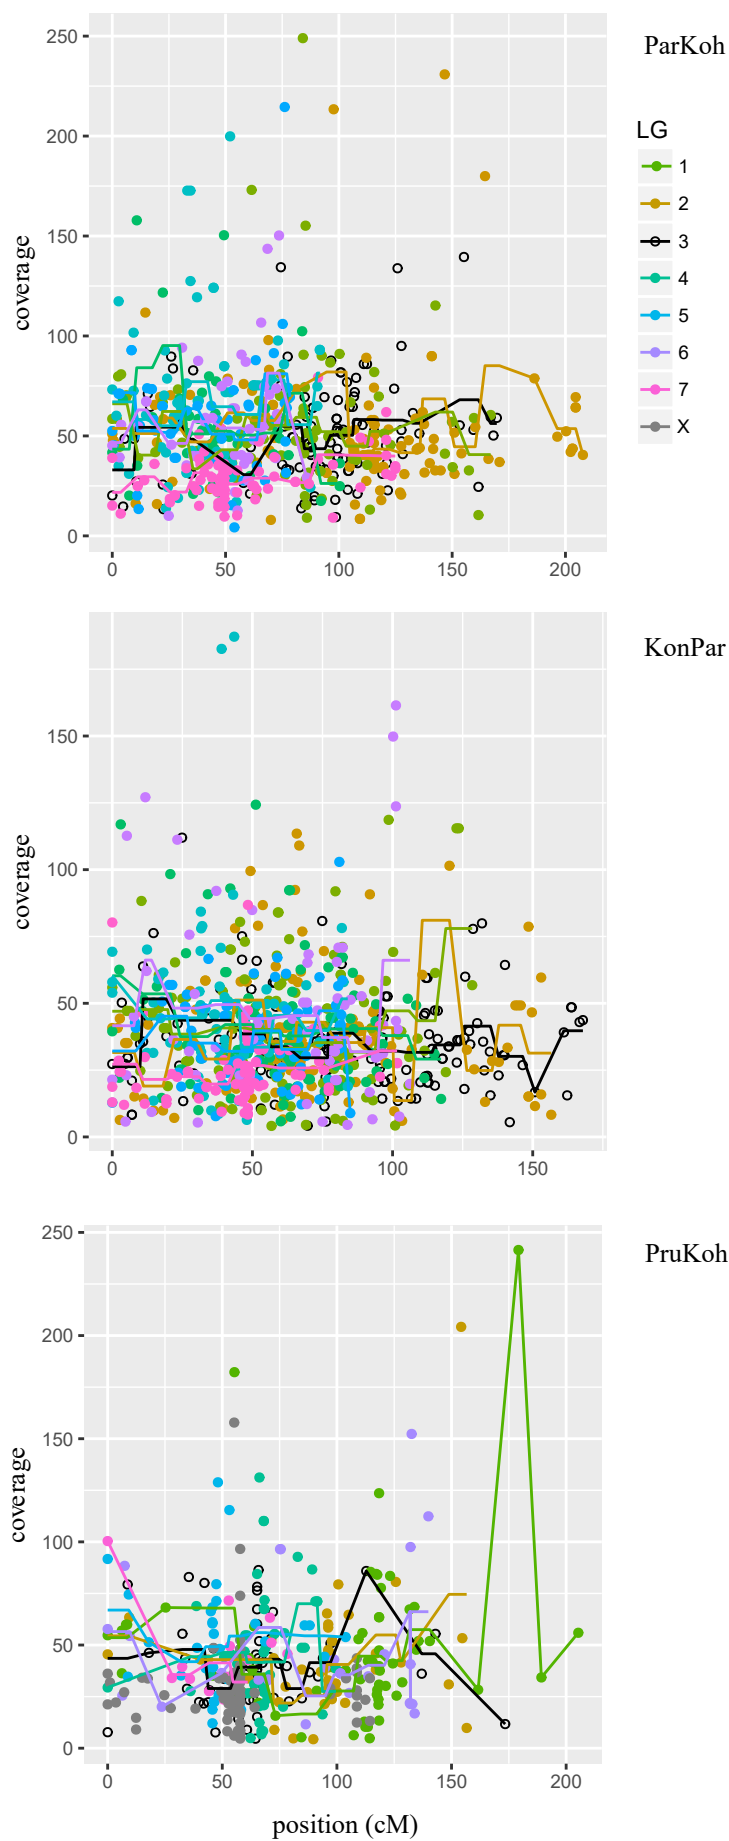

Figure S3. Coverage per cross per linkage group. For each of the three linkage maps (ParKoh, KonPar, PruKoh) the variation in coverage across the 8 linkage groups is shown. Coverage is calculated as the average (across individuals) read count per marker (points). Solid lines show 10-cM non-sliding window averages.
